# Supplementary material for: Dynamic regulation of hepatic lipid metabolism by torsinA and its activators
Source: JCI journal article supplement (doi:10.1172/jci.insight.175328), 2024-01-09

Full unedited gel for Figure 1C

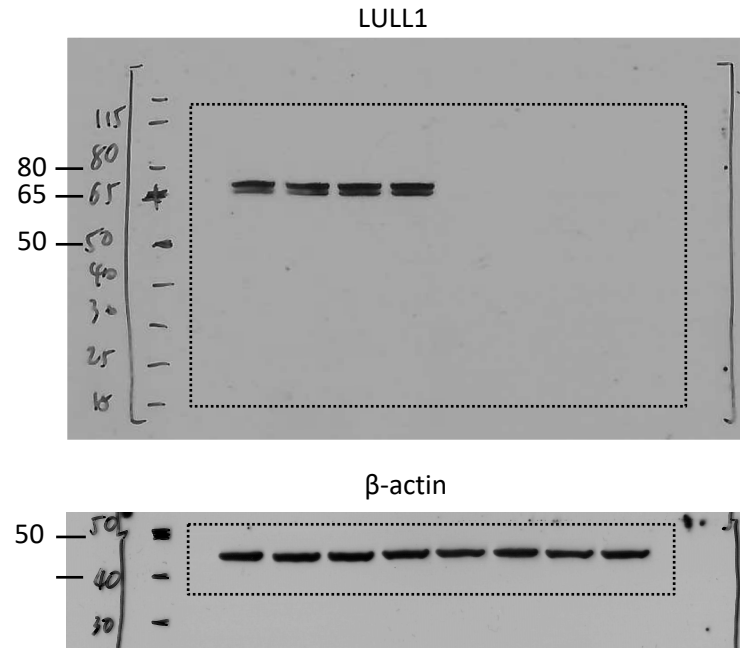

Full unedited gel Figure 1H

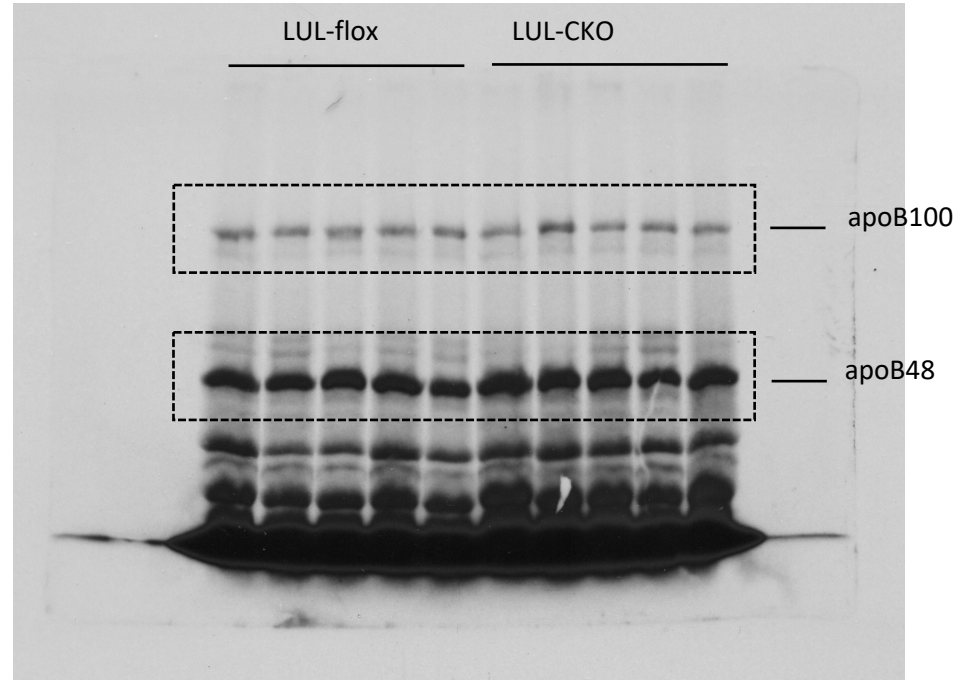

# Full unedited gel for Figure 2A

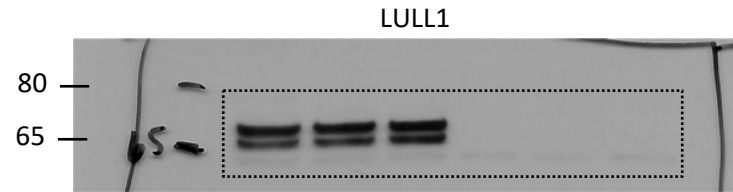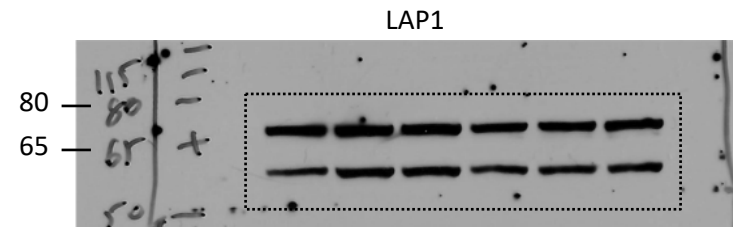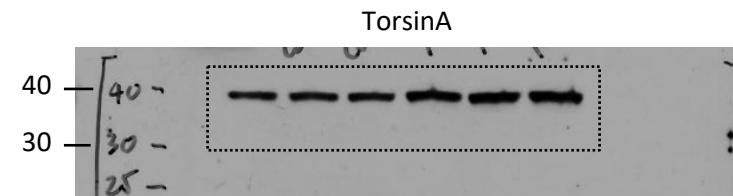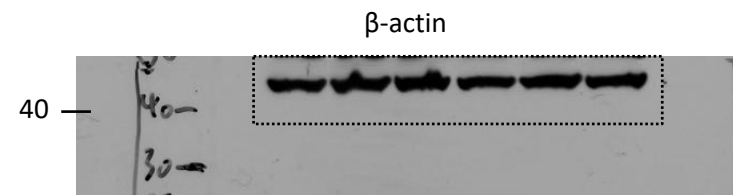

# Full unedited gel for Figure 3A

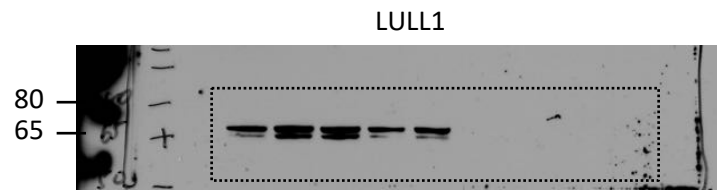

Intensity #2 Additional for Quantification

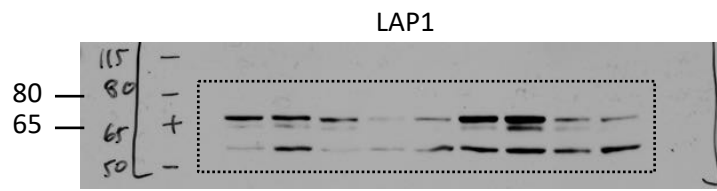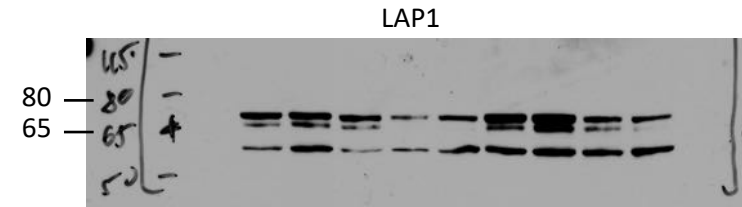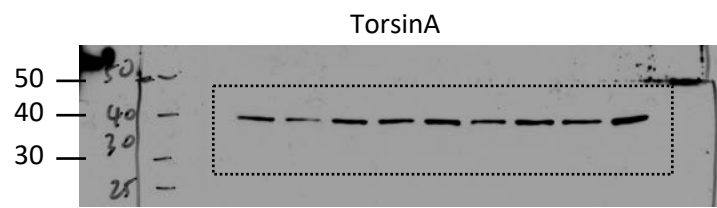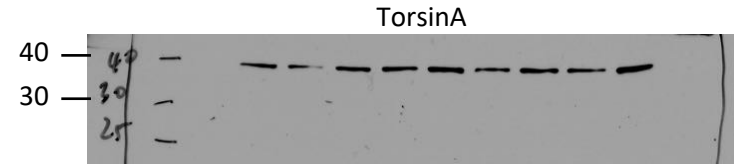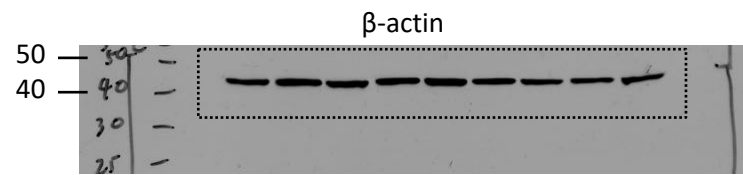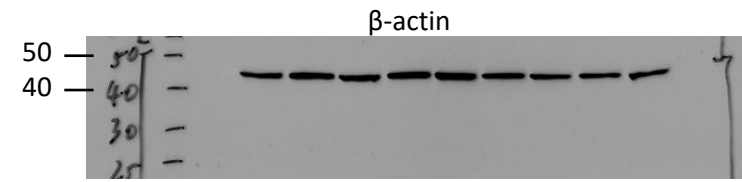

# Full unedited gel for Figure 4A

Intensity #2 Additional for Quantification

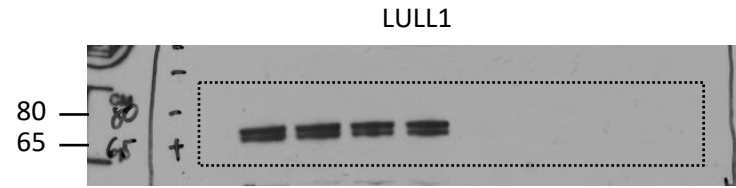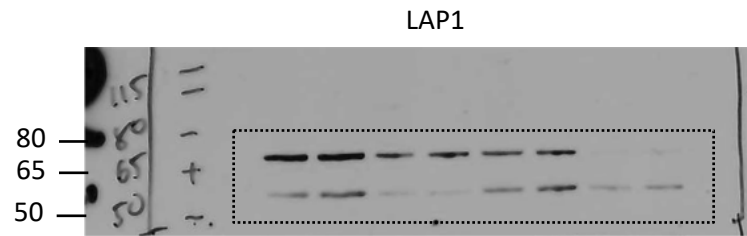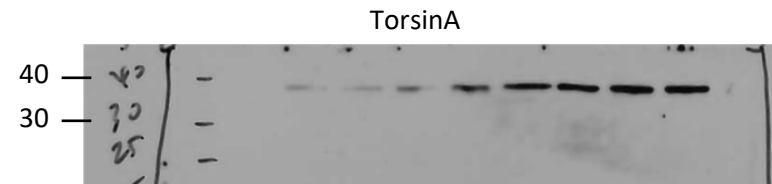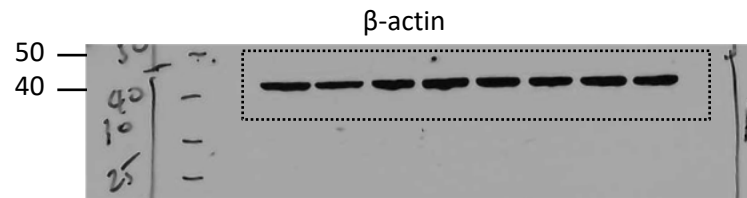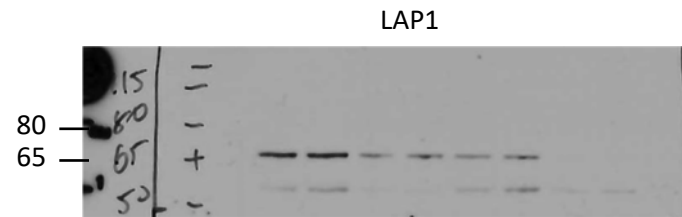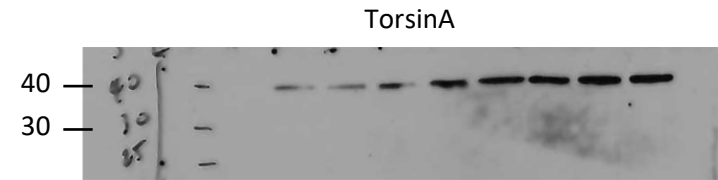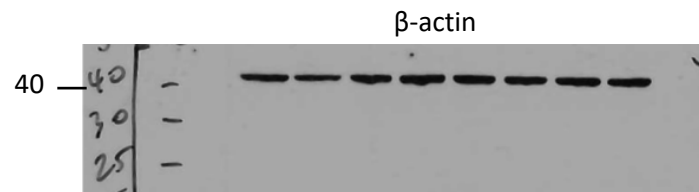

# Full unedited gel for Figure 6C

Experiment date: 9/28/21

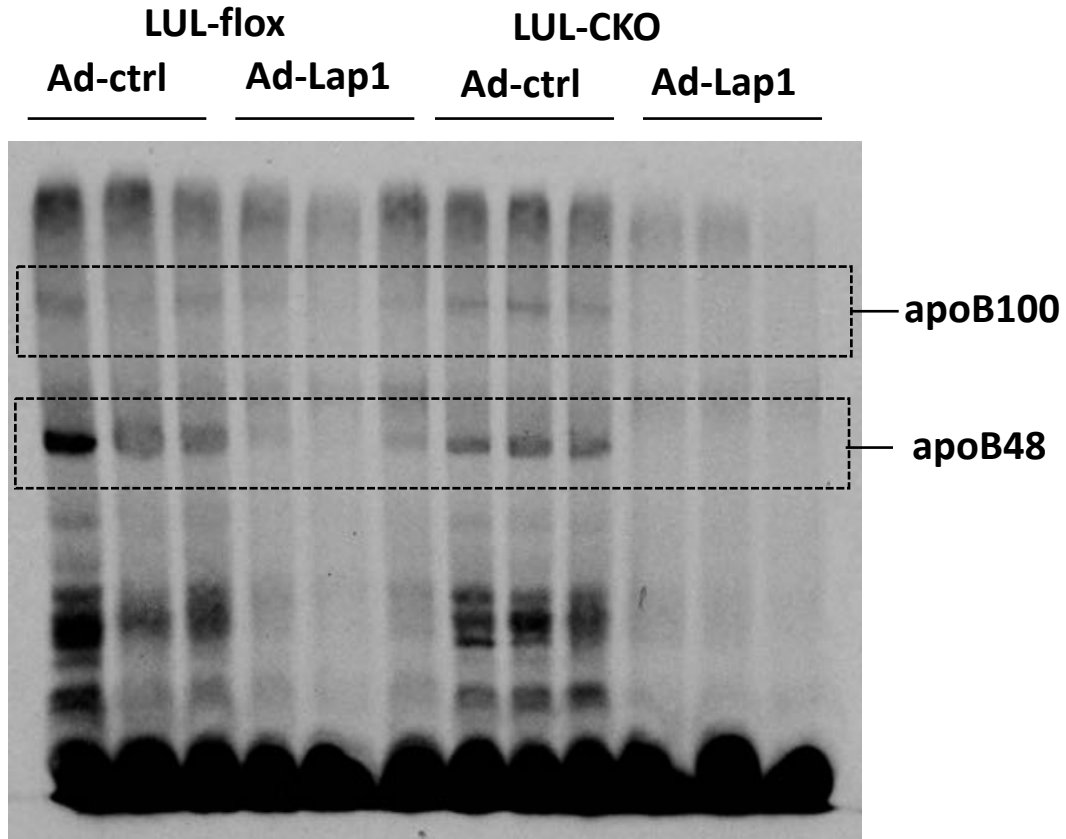

Experiment date: 8/2/23

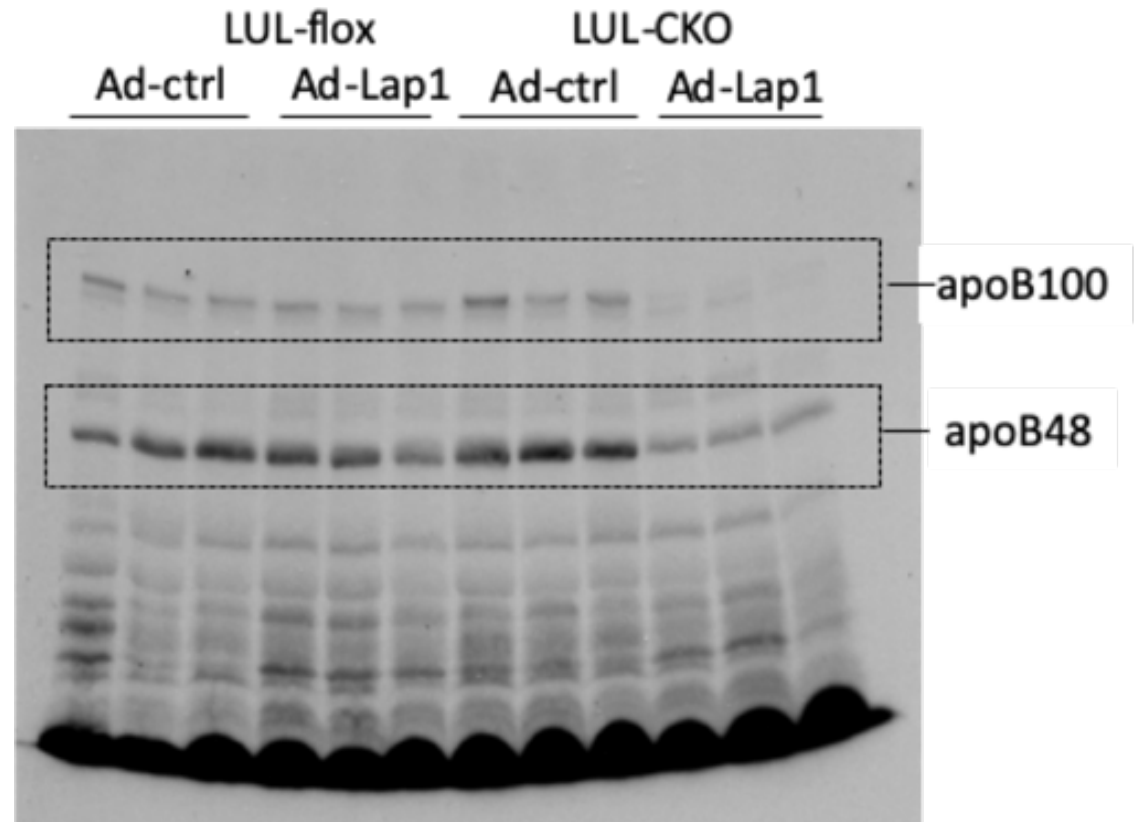

## Full unedited gel for Supplemental Figure 2

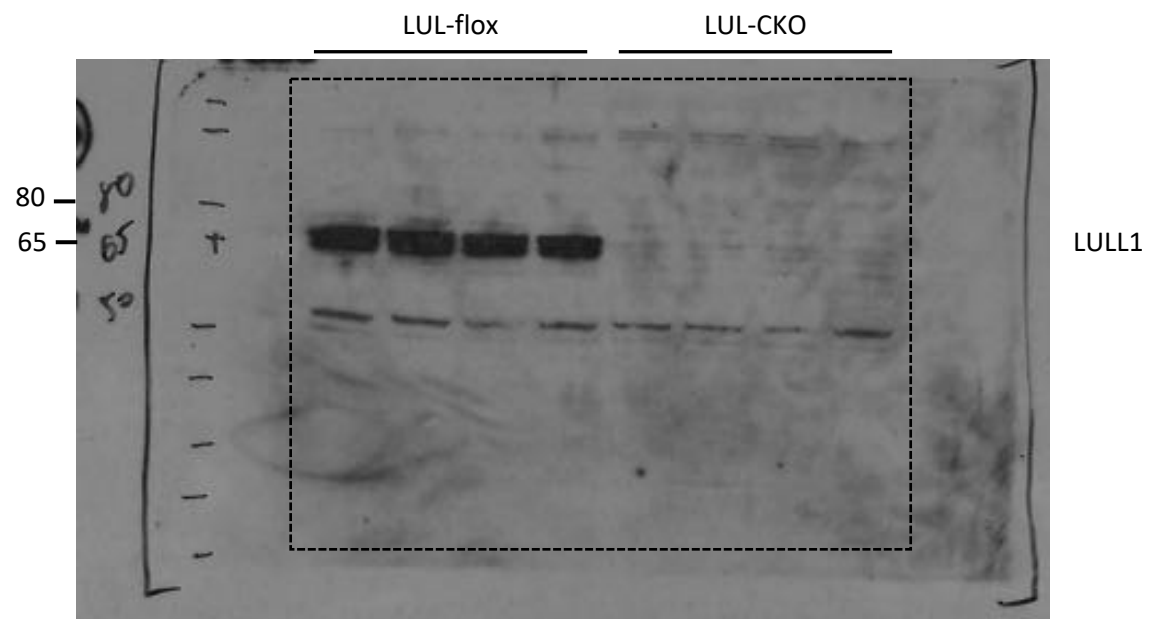

# Full unedited gel for Supplemental Figure 4A

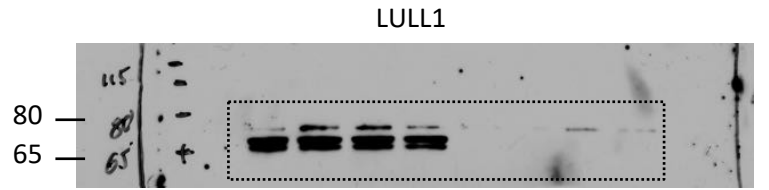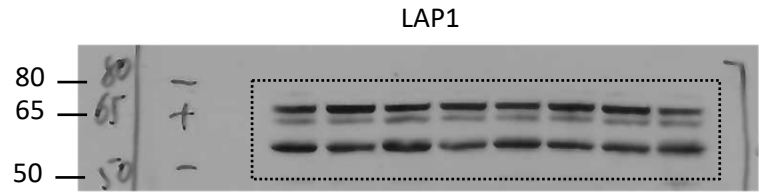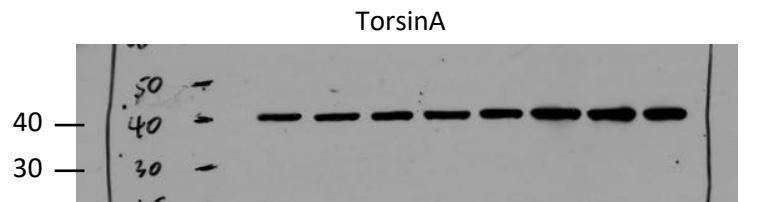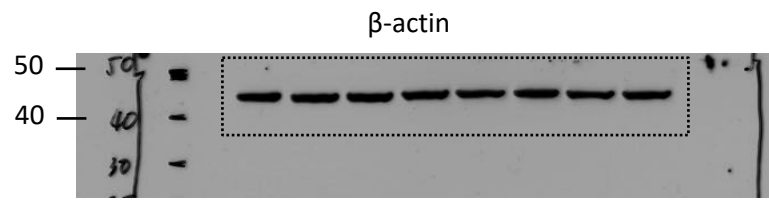

# Full unedited gel for Supplemental Figure 6

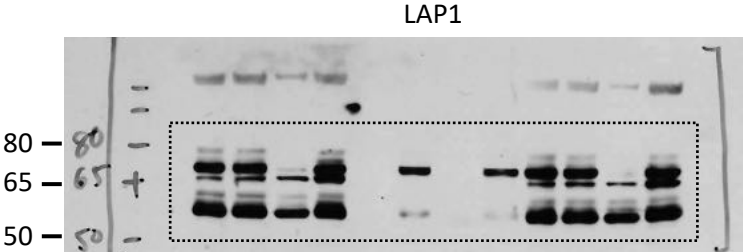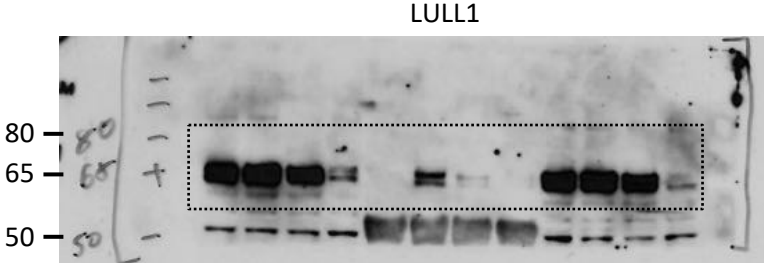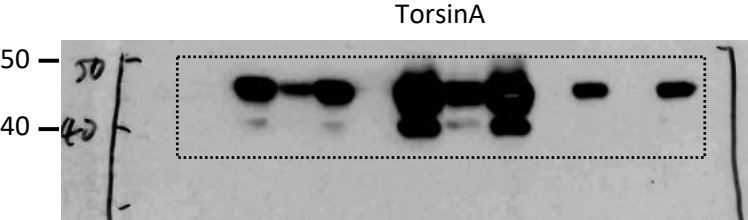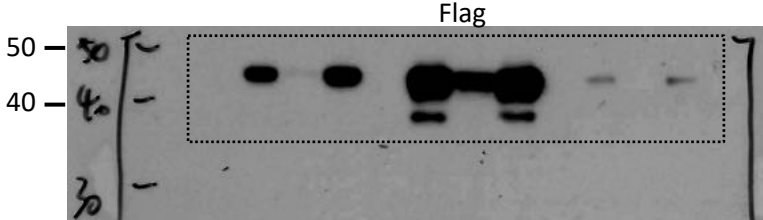



Full unedited gel for Supplemental Figure 7A

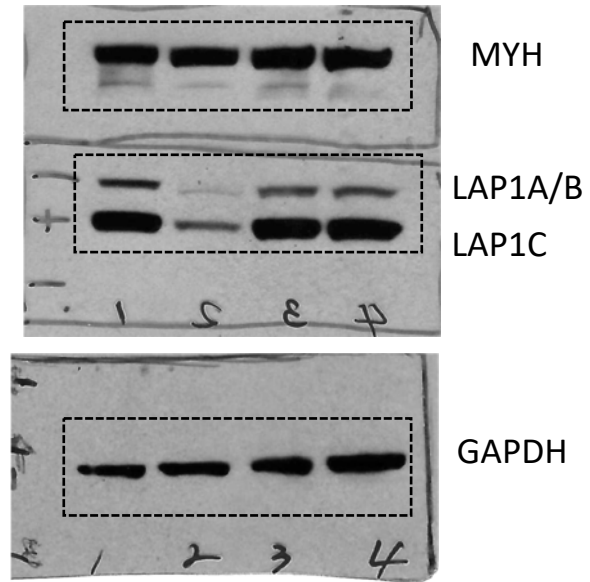

Full unedited gel for Supplemental Figure 7B

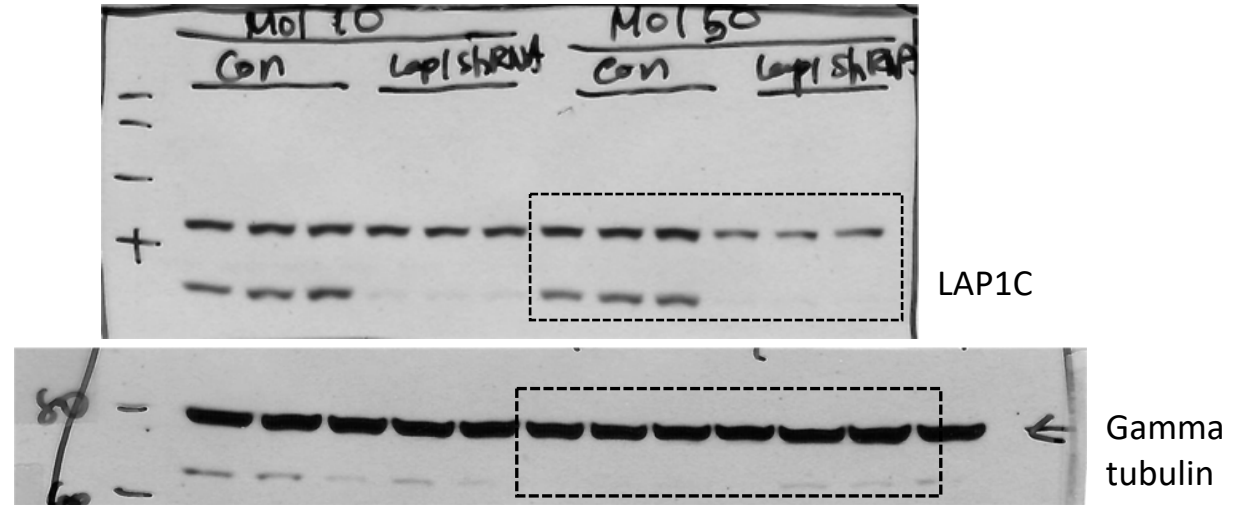

Full unedited gel for Supplemental Figure 10C

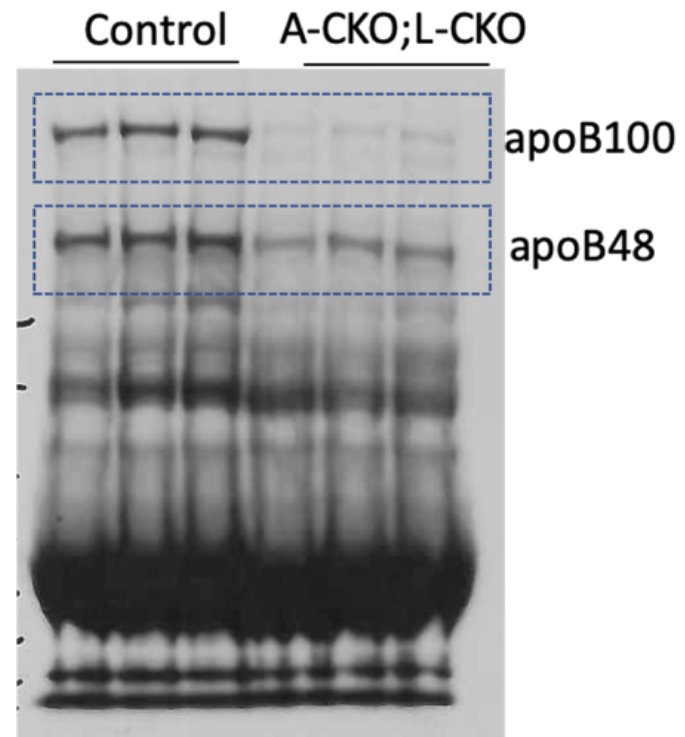

Supplement: sd2 [file 2]
